# Supplementary material for: Photocatalyzed electron exchange between organic chromophores and hematite nanoparticles and the role of solid-state charge transport
Source: Royal Society of Chemistry journal article supplement (doi:10.1039/d2en00567k), 2022-01-01
Supplement: d2en00567k1.pdf [file d2en00567k1.pdf]

## Photocatalyzed Electron Exchange between Organic Chromophores and Hematite Nanoparticles and the Role of Solid-State Charge Transport

Mavis D. Boamah, Xiaopeng Huang, Alan Joly, Zheming Wang, and Kevin M. Rosso

Pacific Northwest National Lab, Physical and Computational Sciences Directorate, Richland, WA 99354.

Corresponding authors: [kevin.rosso@pnnl.gov](mailto:kevin.rosso@pnnl.gov), [mavis.boamah@pnnl.gov](mailto:mavis.boamah@pnnl.gov)

### Supplementary Information

**Description.** This document contains supporting texts, figures, and tables for the main manuscript.

**Table S1** shows the amount of rhodamine B sorbed by the HNPs at unadjusted pH values in methanol medium.

**Table S2** details the amount of rhodamine B sorbed by the HNPs at pH 11.

**Text S1** describes the transient absorption spectroscopy results obtained for RhB and RhB+HNPs at natural pH values and pH 11.

**Figures S1-S4** depict the transient absorption and decay curves for 65  $\mu\text{M}$  and 20  $\mu\text{M}$  rhodamine B suspended with HNPs in methanol at unadjusted pH values of  $\sim 6.7$  and  $\sim 3$ .

**Figures S5-S8** display the transient absorption and decay curves for 65  $\mu\text{M}$  and 20  $\mu\text{M}$  rhodamine B suspension with HNPs in methanol and water at pH 11.

**Table S3** details the decay time constants obtained via global Glotaran fits for 65  $\mu\text{M}$  and 20  $\mu\text{M}$  rhodamine in suspension with 0.1 g/L HNPs in methanol.

**Table S4** reports the decay time constants for 65  $\mu\text{M}$  and 20  $\mu\text{M}$  rhodamine B suspension with HNPs in methanol and water at pH 11 retrieved from global Glotaran fits.

**Figure S9** displays the differences retrieved for  $\Delta\text{OD}$  for 65  $\mu\text{M}$  RhB with and without HNPs for all delay positions for pH 4.5, 7, 9, and 11.

**Text S2** explains transient absorption spectroscopy results recorded for only hematite nanoparticles suspensions.

**Figures S10 and S11** illustrate transient absorption and decay curves for 1 g/L HNPs suspended in water at pH 3 for two experiments.

**Tables S1-S2**

| <b>Solvent</b> | <b>[RhB] [μM]</b> | <b>pH Before</b> | <b>pH After</b> | <b>[HNP] [g/L]</b> | <b>[RhB] sorbed by HNPs [μM]</b> | <b>Sorbed RhB [μmol/m<sup>2</sup>]</b> |
|----------------|-------------------|------------------|-----------------|--------------------|----------------------------------|----------------------------------------|
| Methanol       | 20                | 6.7              | 3               | 0.2                | 2.57±0.12                        | 0.34±0.02                              |
| Methanol       | 65                | 6.7              | 3               | 0.1                | 7.14±3.50                        | 1.90±0.93                              |
| Water          | 20                | 6.7              | 3.2             | 0.2                | 3.00±0.41                        | 0.40±0.05                              |
| Water          | 65                | 6.7              | 3.4             | 0.1                | 4.10±0.52                        | 1.09±0.14                              |

Table S1. This table shows the amount of rhodamine B sorbed onto hematite nanoparticles at unadjusted pH values by 65 μM and 20 μM rhodamine B with 0.1 g/L and 0.2 g/L HNPs respectively in methanol and water

| <b>Solvent</b> | <b>[RhB] [μM]</b> | <b>pH</b> | <b>[HNP] [g/L]</b> | <b>[RhB] sorbed by HNPs [μM]</b> | <b>Sorbed RhB [μmol/m<sup>2</sup>]</b> |
|----------------|-------------------|-----------|--------------------|----------------------------------|----------------------------------------|
| Methanol       | 20                | 11        | 0.2                | 2.12±0.77                        | 0.26±0.09                              |
| Methanol       | 65                | 11        | 0.1                | 7.14±3.15                        | 1.90±0.84                              |
| Water          | 20                | 11        | 0.2                | 5.37±0.40                        | 0.65±0.05                              |
| Water          | 65                | 11        | 0.1                | 6.69±0.42                        | 1.78±0.11                              |

Table S2. This table displays the amount of rhodamine B sorbed onto hematite nanoparticles at 11 by 65 μM and 20 μM rhodamine B with 0.1 g/L and 0.2 g/L HNPs respectively.

## Text S1

We performed time-resolved transient absorption experiments for 65  $\mu\text{M}$  and 20  $\mu\text{M}$  dye samples with HNPs in both methanol and water at pH 11 and an unadjusted pH value of 3 (See SI, Figs. S1-S6, Tables S3-S4). The 20  $\mu\text{M}$  RhB samples contained 0.2 g/L loadings of HNPs. In contrast, the 65  $\mu\text{M}$  samples were suspended with 0.1 g/L loadings of hematite nanoparticles. We carried out triplicate measurements for each RhB dye concentration, HNPs loadings, and solvent studied at pH 11 and 3.

Unlike at the buffered pH conditions discussed below, where  $\tau_1$  values remained relatively constant after equilibration with HNP suspensions,  $\tau_1$  values changed for the RhB versus RhB+HNPs samples at pH 6.7 and pH 3, respectively (Tables S3). We attribute this to the drastic change in pH following HNPs addition which possibly plays a role in the dye's dimerization thereby affecting the dimer's excited state lifetime. The first excited state relaxation lifetime,  $\tau_1$  increases by one order of magnitude after adding HNPs at pH 3 for the 65  $\mu\text{M}$  and 20  $\mu\text{M}$  RhB in methanol (Tables S3).  $\tau_1$  increases by one order of magnitude for 65  $\mu\text{M}$  in water but decreases by an order of magnitude for 20  $\mu\text{M}$  in water after adding HNPs. For the unadjusted pH samples, we observe that  $\tau_2$  increases by  $\sim 50\%$  or more in methanol but decreases by at least 28% in water when HNPs are included (see Table S3). At the unadjusted pH conditions,  $\tau_3$  increases by at least an order of magnitude for 20  $\mu\text{M}$  dye in methanol, 65  $\mu\text{M}$ , and 20  $\mu\text{M}$  dye RhB dye concentrations in water but decreases by one order of magnitude for 65  $\mu\text{M}$  dye in methanol after HNPs addition (Table S3).

After performing Glotaran analysis, we observe that  $\tau_1$  for the dye barely changes after sorption by HNPs within standard measurement error at pH 11. By taking into account standard deviation values,  $\tau_1$  values at pH 11 do not change from RhB to RhB+HNPs (Table S4). The fluorescence decay lifetime (second excited state relaxation lifetime,  $\tau_2$ ) decreases by  $\sim 9\%$  or more following HNPs inclusion at pH 11 (Table S4). Likewise,  $\tau_3$  decreases by at least 35% after addition of HNPs at pH 11 except for 20  $\mu\text{M}$  dye and 0.2 g/L HNPs suspensions in water where  $\tau_3$  relatively stays the same when uncertainty is considered after

HNPS addition (Table S4). Similarly,  $\tau_3$  decreases or remains the same when considering uncertainties while comparing RhB and RhB+HNPs at pH 11 in water and methanol (see SI, Text SI, Table S4)

Figures S1-S4

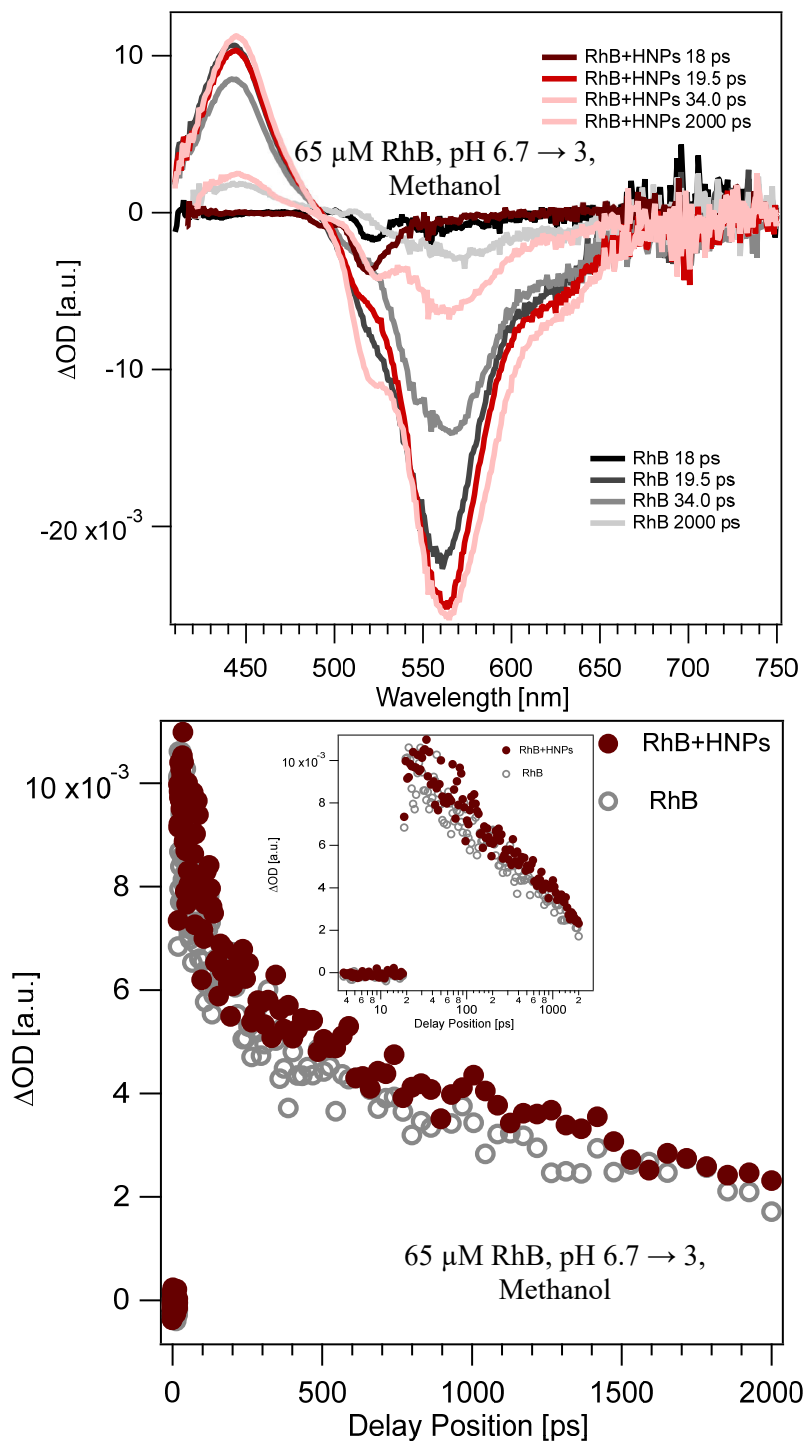

Figure S1. (Top) Transient absorption spectra for 65  $\mu\text{M}$  Rhodamine B with and without 0.1 g/L hematite nanoparticles suspended in methanol at unadjusted pH values of 6.7 (RhB only) and 3 (RhB+HNPs). (Bottom) Transient absorption kinetics for 65  $\mu\text{M}$  Rhodamine B with and without 0.1 g/L hematite nanoparticles in suspension in methanol medium at unadjusted pH values of 6.7 (RhB only) and 3 (RhB+HNPs) at 448 nm wavelength.

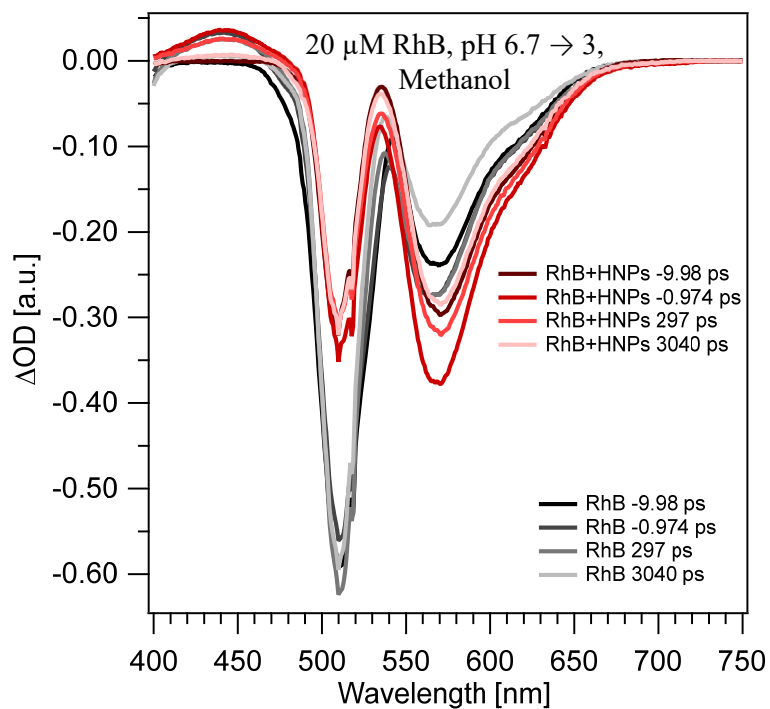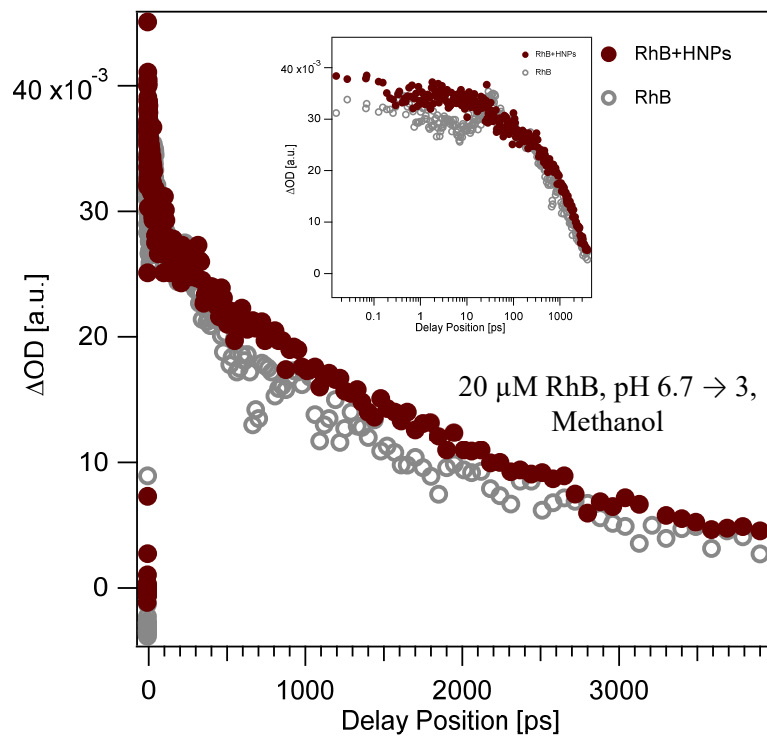

Figure S2. (Top) Transient absorption spectra for 20  $\mu\text{M}$  Rhodamine B with and without 0.2 g/L hematite nanoparticles suspended in methanol at unadjusted pH values of 6.7 (RhB) and 3 (RhB+HNPs). (Bottom) Transient absorption kinetics for 20  $\mu\text{M}$  Rhodamine B with and without 0.2 g/L hematite nanoparticles in suspension in methanol medium at unadjusted pH values of 6.7 (RhB only) and 3 (RhB+HNPs), at 448 nm wavelength.

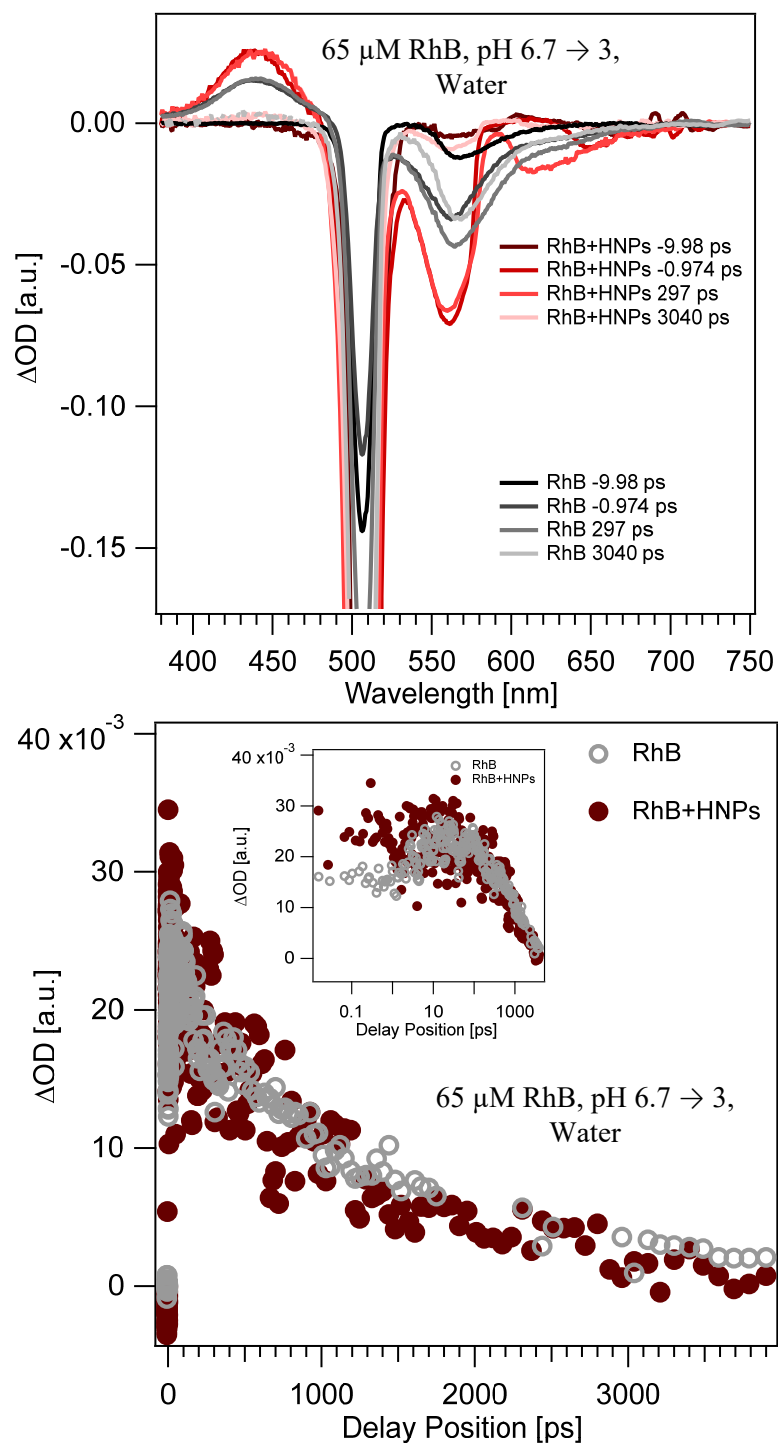

Figure S3. (Top) Transient absorption spectra for 65  $\mu\text{M}$  Rhodamine B with and without 0.1 g/L hematite nanoparticles suspended in water at unadjusted pH values of 6.7 (RhB only) and 3 (RhB+HNPs). (Bottom) Transient absorption kinetics for 65  $\mu\text{M}$  Rhodamine B with and without 0.1 g/L hematite nanoparticles in suspension in water medium at unadjusted pH values of 6.7 (RhB only) and 3 (RhB+HNPs) at 448 nm wavelength.

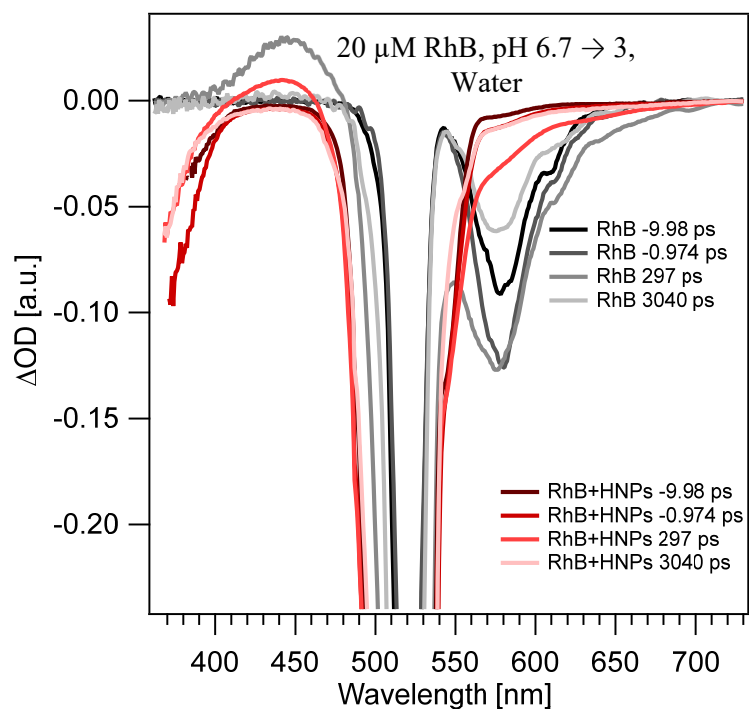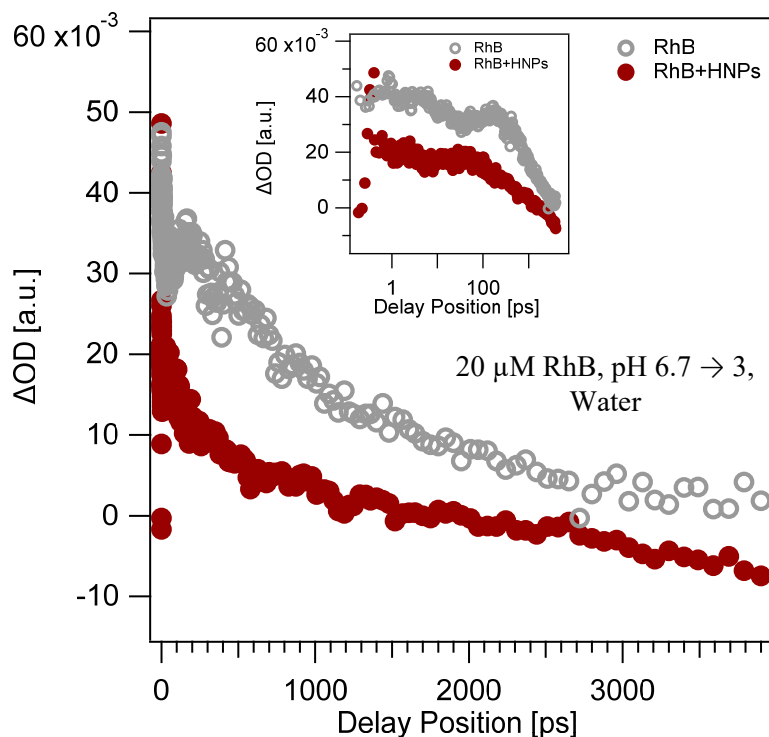

Figure S4. (Top) Transient absorption spectra for 20  $\mu\text{M}$  Rhodamine B with and without 0.2 g/L hematite nanoparticles suspended in water at unadjusted pH values of 6.7 (RhB only) and 3 (RhB+HNPs). (Bottom) Transient absorption kinetics for 20  $\mu\text{M}$  Rhodamine B with and without 0.2 g/L hematite nanoparticles in suspension in water medium at unadjusted pH values of 6.7 (RhB only) and 3 (RhB+HNPs) at 448 nm wavelength.



Figures S5-S8

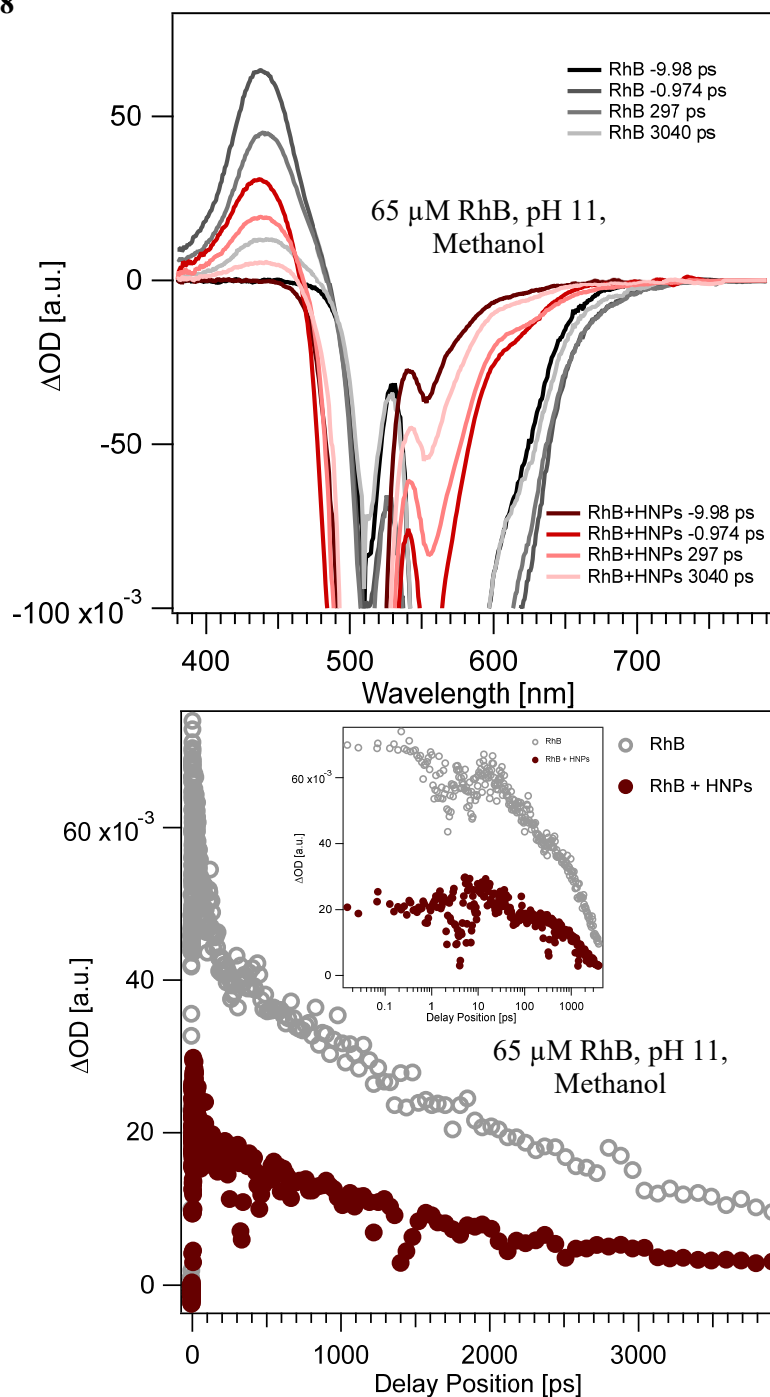

Figure S5. (Top) Transient absorption spectra for 65  $\mu\text{M}$  Rhodamine B with and without 0.1 g/L hematite nanoparticles suspended in methanol at pH 11 and different delay times. (Bottom) Transient absorption kinetics for 65  $\mu\text{M}$  Rhodamine B with and without 0.1 g/L hematite nanoparticles in suspension in methanol medium at pH 11 at 448 nm wavelength. To facilitate a continuity of explaining observed trends, figure S1 is the same as figure 5.

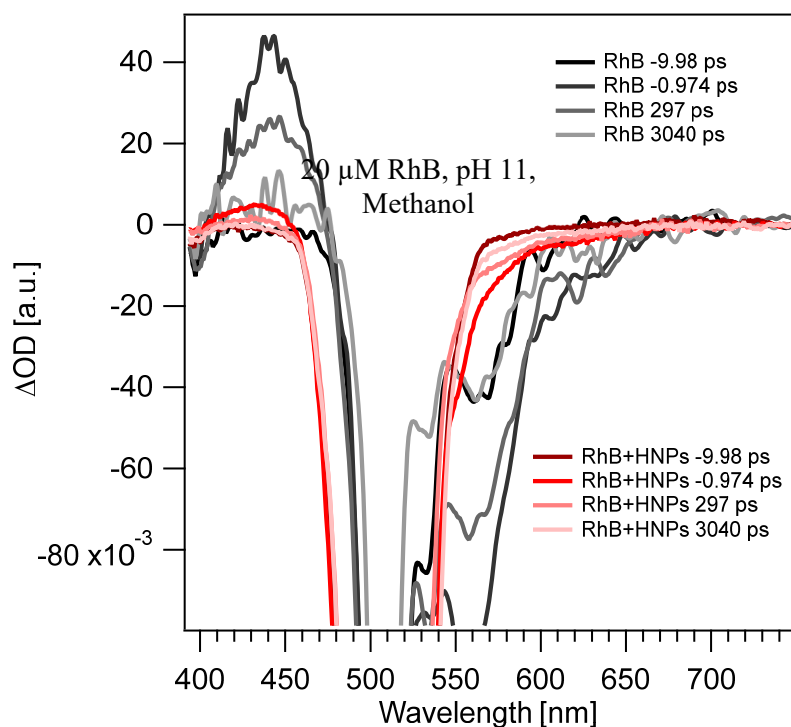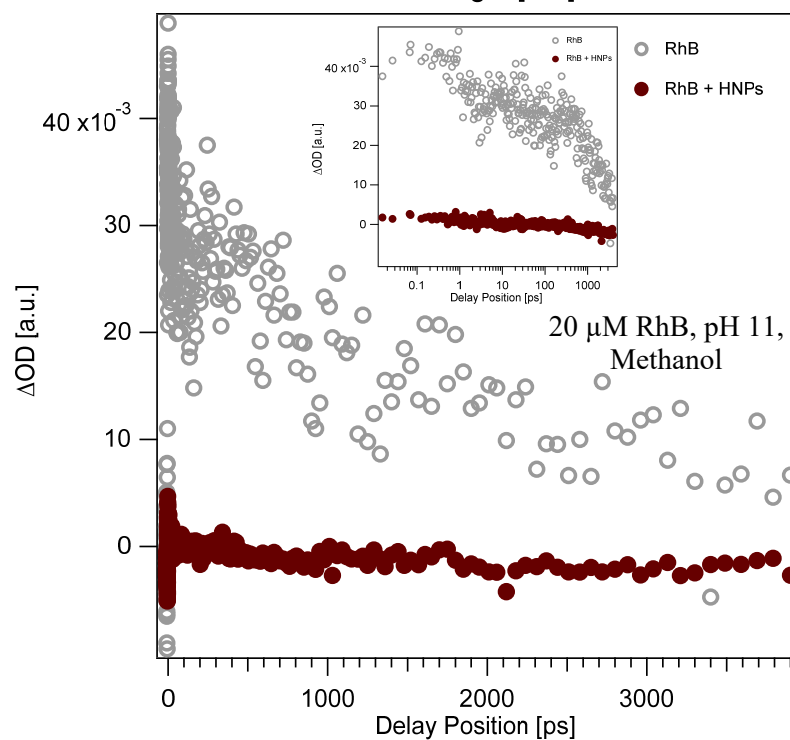

Figure S6. (Top) Transient absorption spectra for 20  $\mu\text{M}$  Rhodamine B with and without 0.2 g/L hematite nanoparticles suspended in methanol at pH 11 and different delay times. (Bottom) Transient absorption kinetics for 20  $\mu\text{M}$  Rhodamine B with and without 0.2 g/L hematite nanoparticles in suspension in methanol medium at pH 11 at 448 nm wavelength.

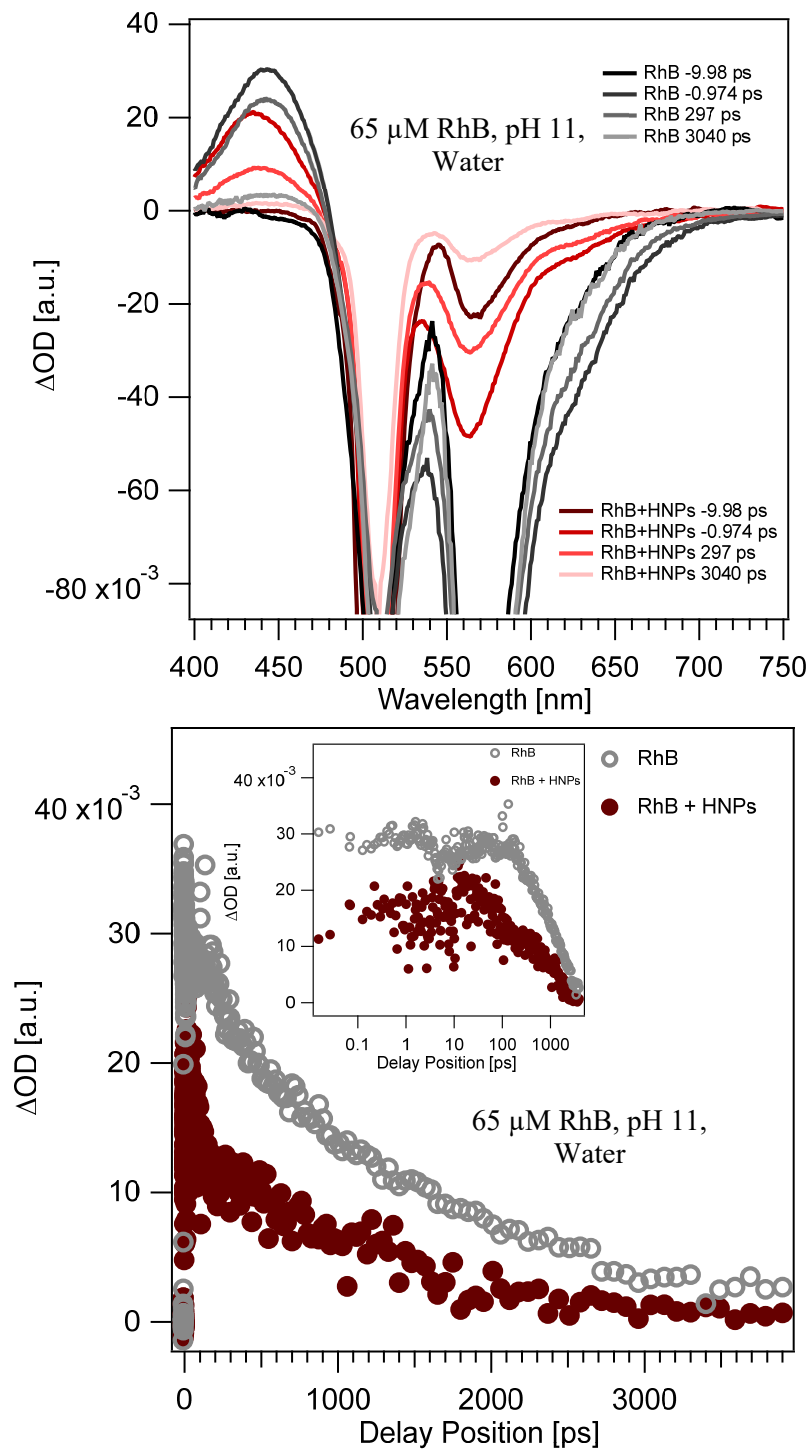

Figure S7. (Top) Transient absorption spectra for 65  $\mu\text{M}$  Rhodamine B with and without 0.1 g/L hematite nanoparticles suspended in water at pH 11 and different delay times. (Bottom) Transient absorption kinetics for 65  $\mu\text{M}$  Rhodamine B with and without 0.1 g/L hematite nanoparticles suspended in water at pH 11 at 448 nm wavelength.

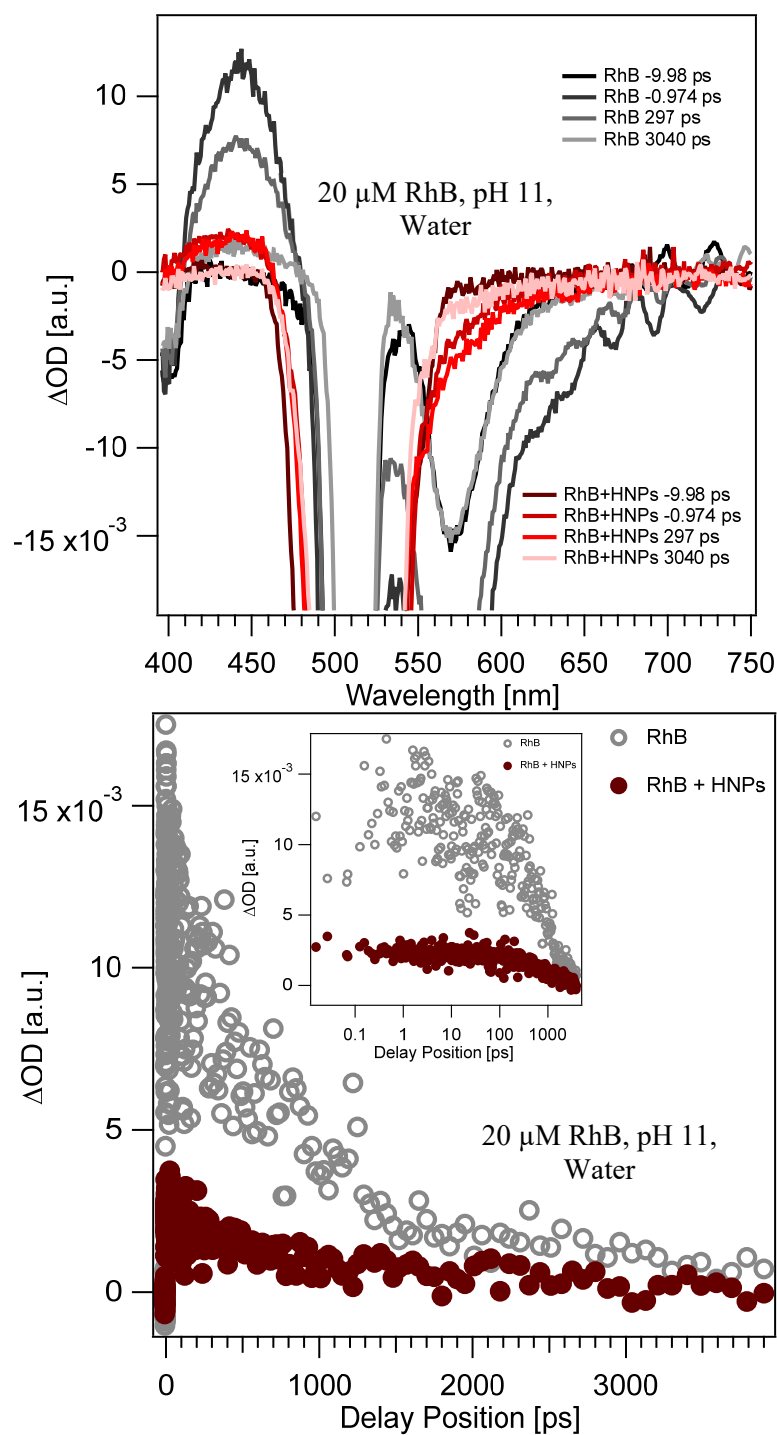

Figure S8. (Top) Transient absorption spectra for 20  $\mu\text{M}$  Rhodamine B with and without 0.2 g/L hematite nanoparticles suspended in water at pH 11. (Bottom) Transient absorption kinetics for 20  $\mu\text{M}$  Rhodamine B with and without 0.2 g/L hematite nanoparticles in suspension in water medium at pH 11 at 448 nm wavelength.

Tables S3-S4

| Solvent  | [RhB]<br>[ $\mu\text{M}$ ] | pH<br>Measured | [HNP]<br>[g/L] | $\tau_1$ [ps] | $\tau_2$ [ps]       | $\tau_3$ [ps]       |
|----------|----------------------------|----------------|----------------|---------------|---------------------|---------------------|
| Methanol | 20                         | ~6.7           | 0.0            | < 63          | 644 $\pm$ 124       | 4900 $\pm$ 223      |
| Methanol | 20                         | ~3             | 0.2            | < 173         | 956 $\pm$ 172       | 29587 $\pm$ 773     |
| Methanol | 65                         | ~6.7           | 0.0            | < 18          | 1808 $\pm$ 70       | 92973 $\pm$ 34600   |
| Methanol | 65                         | ~3             | 0.1            | 220 $\pm$ 7   | 184000 $\pm$ 113000 | 12500 $\pm$ 584     |
| Water    | 20                         | ~6.7           | 0.0            | < 6           | 2300 $\pm$ 92       | 97100 $\pm$ 4410    |
| Water    | 20                         | ~3.2           | 0.2            | < 18          | 1640 $\pm$ 65       | 257000 $\pm$ 12200  |
| Water    | 65                         | ~6.7           | 0.0            | < 115         | 1920 $\pm$ 75       | 2620 $\pm$ 44       |
| Water    | 65                         | ~3.4           | 0.1            | < 11          | 765 $\pm$ 53        | 142857 $\pm$ 129907 |

Table S3. Excited state relaxation time values for RhB and RhB+HNPs suspensions with no pH adjusted.

| Solvent  | [RhB]<br>[ $\mu\text{M}$ ] | pH | [HNP]<br>[g/L] | $\tau_1$ [ps] | $\tau_2$ [ps]   | $\tau_3$ [ps]    |
|----------|----------------------------|----|----------------|---------------|-----------------|------------------|
| Methanol | 20                         | 11 | 0.0            | 3 $\pm$ 3     | 6444 $\pm$ 745  | 5442 $\pm$ 386   |
| Methanol | 20                         | 11 | 0.2            | 1.5 $\pm$ 0.7 | 3503 $\pm$ 209  | 2429 $\pm$ 84    |
| Methanol | 65                         | 11 | 0.0            | 6 $\pm$ 5     | 5337 $\pm$ 1901 | 14057 $\pm$ 5108 |
| Methanol | 65                         | 11 | 0.1            | 1.3 $\pm$ 0.6 | 4863 $\pm$ 1190 | 3433 $\pm$ 1023  |
| Water    | 20                         | 11 | 0.0            | 21 $\pm$ 16   | 4994 $\pm$ 2362 | 20154 $\pm$ 8364 |
| Water    | 20                         | 11 | 0.2            | 9 $\pm$ 12    | 970 $\pm$ 84    | 22722 $\pm$ 2346 |
| Water    | 65                         | 11 | 0.0            | 12 $\pm$ 20   | 1388 $\pm$ 132  | 5621 $\pm$ 554   |
| Water    | 65                         | 11 | 0.1            | 4 $\pm$ 3     | 532 $\pm$ 17    | 3285 $\pm$ 82    |

Table S4. Excited state relaxation time values for RhB and RhB+HNPs suspensions at pH 11.

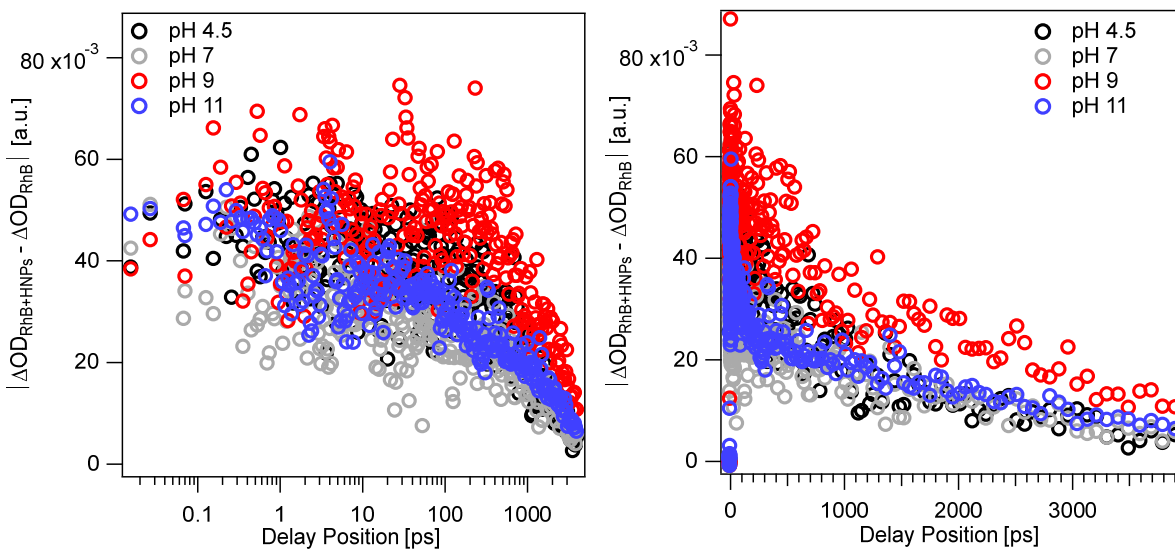

Figure S9. Difference in  $\Delta OD$  derived from transient absorption kinetics for 65  $\mu\text{M}$  Rhodamine B with and without 0.1 g/L hematite nanoparticles in suspension in methanol medium at pH 4, 5, 7, 9, and 11 at 448 nm wavelength. Left – Log scale, Right – Linear scale

## Text S2

### Transient Absorption of Hematite Nanoparticle Suspensions.

We collected transient absorption data for 0.1 g/L and 1 g/L HNPs suspended in water at pH 3 (Figs. S9-S10). Unfortunately, the transient absorption curves for 0.1 g/LHNP suspensions have no prominent positive  $\Delta OD$  peaks at all wavelengths owing to a low signal-to-noise ratio. The 1 g/L HNPs suspensions show positive  $\Delta OD$  peaks above  $\sim 550$  nm, albeit  $\Delta OD$  values could be only observed above 500 nm. As a result, we stick to 0.1 g/L of HNPs loading for RhB+HNPs suspensions to not cut out the positive  $\Delta OD$  peak below 500 nm for RhB. Fitting the decay data of the 1 g/L HNPs suspensions to a biexponential decay curve at 600 nm yielded averaged excited-state relaxation time values of  $98 \pm 30$  ps and  $1018 \pm 501$  ps (see Fig. S10). The HNPs' excited state relaxation time(s) we obtained agree at least within an order of magnitude with that reported in the literature.<sup>1</sup> Transient absorption studies of hematite nanofilms yielded two excited-state relaxation time values of 5.7 ps and  $> 670$  ps after fitting positive  $\Delta OD$  TA kinetic curves recorded at 579 nm or 2.14 eV.<sup>1</sup> In their work, they point out that the  $\Delta OD$  response is positive within the 2 – 2.3 eV (540 – 620 nm) using a pump wavelength of 400 nm, which is identical to the positive  $\Delta OD$  region we observe above  $\sim 550$  nm with a 515 nm pump wavelength. Negative  $\Delta OD$  values or ground state bleaching peak centered around  $\sim 505$  nm is due to absorption into impurity states in the conduction band edge.<sup>1,2</sup>

Pump excitation of HNPs produces a range of electrons and holes within the valence and conduction bands of the hematite nanoplatelets. Based on previous work, the positive  $\Delta OD$  values generated by the probe beam energies carry contributions from excited-state electron absorption (EA) and excited-state hole absorption (HA, i.e., hole filling), with EA being the highest contributor.<sup>2-4</sup> Excited state electron absorption involves intra-transitions within the conduction band, whereas photogenerated holes are occupied through intra-transitions in the valence band of hematite during excited state hole absorption.<sup>1</sup> Therefore, the recombination of relaxed electrons (i.e., fully relaxed hot electrons in the lower conduction band of hematite) with holes is accountable for the longer lifetime values ( $98 \pm 30$  ps and  $1018 \pm 501$  ps) we

retrieved.<sup>1</sup> Given these lifetime values, we would expect electrons transferred from photoexcited RhB in suspension to fill photogenerated holes in the conduction and valence bands, thus intermeddling with the EA and HA process of photoexcited hematite on similar timescales.



Figures S10-S11

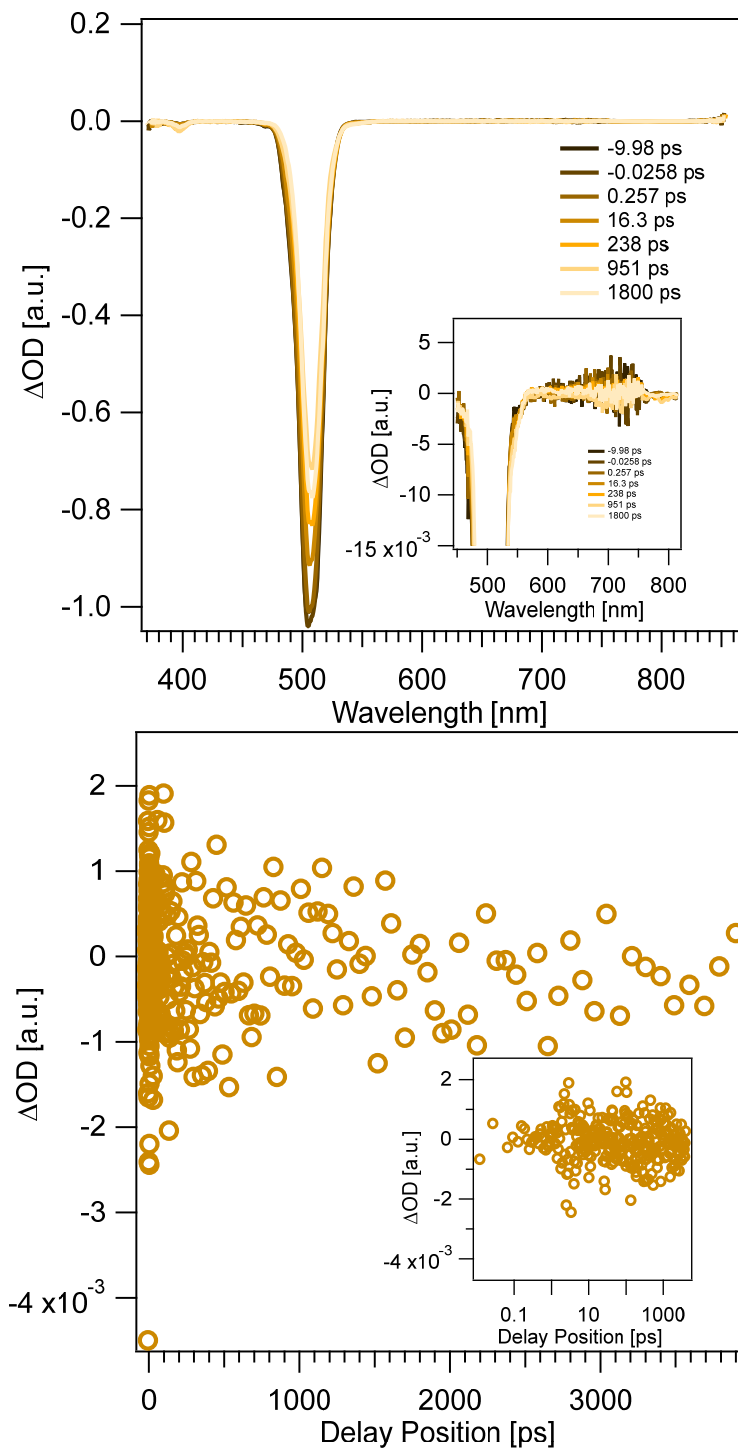

Figure S10. (Top) Transient absorption spectra for 0.1 g/L hematite nanoparticles suspended in water (Bottom) Transient absorption kinetics for 0.1 g/L hematite nanoparticles suspended in water at pH 3 at 600 nm wavelength.

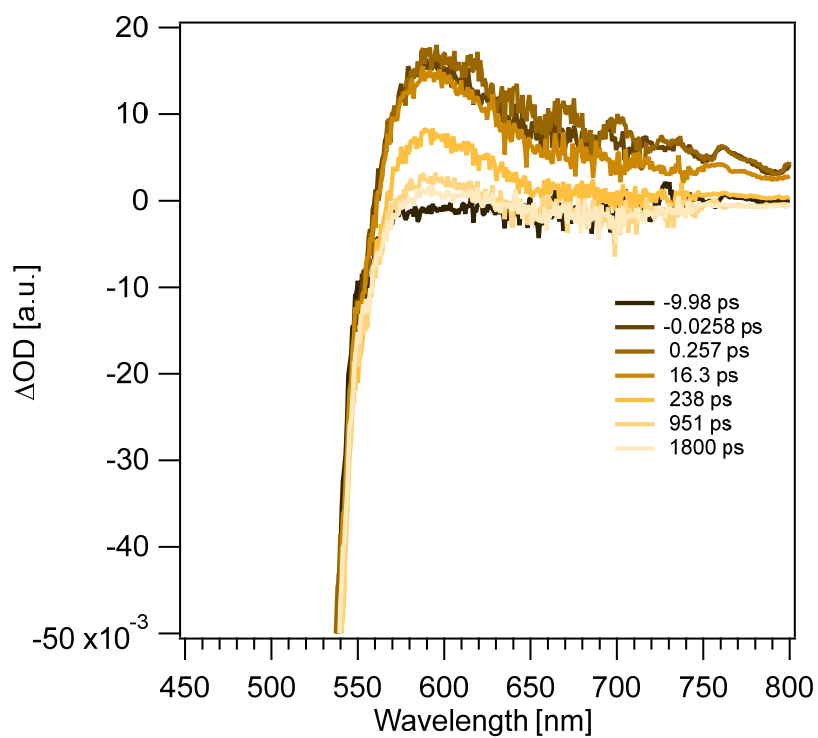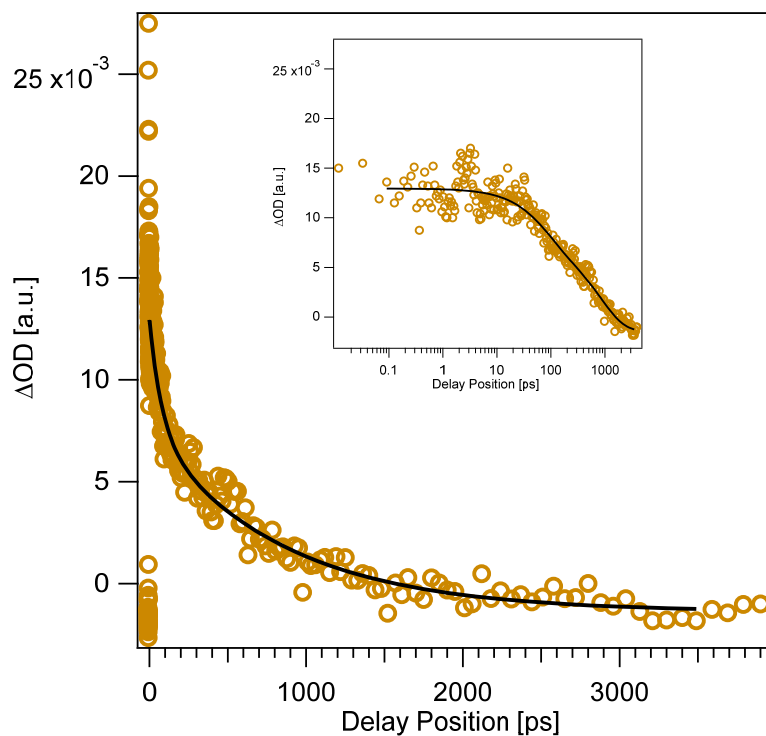

Figure S11. (Top) Transient absorption spectra for 1 g/L hematite nanoparticles suspended in water (Bottom) Transient absorption kinetics for 1 g/L hematite nanoparticles suspended in water at pH 3 at 600 nm wavelength.

## Biexponential Fits for Transient Absorption Kinetics Data of Hematite Nanoparticles Suspensions.

We fitted the bottom part of Fig. S11 to a bi-exponential equation.  $y = y_0 + A_1 e^{-\frac{(x-x_0)}{\tau_1}} + A_2 e^{-\frac{(x-x_0)}{\tau_2}}$  in Igor Pro software. The fit parameters are listed below:

$$y_0 = -0.0007409 \pm 0.000408, x_0 = 0.0117, A_1 = 0.0057717 \pm 0.00648, \\ A_2 = 0.0092217 \pm 0.000555 \\ \tau_1 = 79.16 \pm 16.2 \text{ ps}, \quad \tau_2 = 843.74 \pm 162 \text{ ps}$$

A duplicate experiment generated the following fit parameters:

$$y_0 = -0.0014838 \pm 0.0011, x_0 = 0.0163, A_1 = 0.0084407 \pm 0.00143, \\ A_2 = 0.0082324 \pm 0.00103 \\ \tau_1 = 116.41 \pm 26.1 \text{ ps}, \quad \tau_2 = 1192.2 \pm 540 \text{ ps}$$

## References

1. S. Sorenson, E. Driscoll, S. Haghighat and J. M. Dawlaty, Ultrafast Carrier Dynamics in Hematite Films: The Role of Photoexcited Electrons in the Transient Optical Response, *J. Phys. Chem. C*, 2014, **118**, 23621-23626.
2. S. R. Pendlebury, M. Barroso, A. J. Cowan, K. Sivula, J. Tang, M. Grätzel, D. Klug and J. R. Durrant, Dynamics of photogenerated holes in nanocrystalline  $\alpha$ -Fe<sub>2</sub>O<sub>3</sub> electrodes for water oxidation probed by transient absorption spectroscopy, *Chem. Commun.*, 2011, **47**, 716-718.
3. V. Nadochenko, N. Denisov, V. Y. Gak, F. Gostev, A. Titov, O. Sarkisov and V. J. R. c. b. Nikandrov, Femtosecond relaxation of photoexcited states in nanosized semiconductor particles of iron oxides, *Russ. Chem. Bull.*, 2002, **51**, 457-461.
4. N. J. Cherepy, D. B. Liston, J. A. Lovejoy, H. Deng and J. Z. Zhang, Ultrafast Studies of Photoexcited Electron Dynamics in  $\gamma$ - and  $\alpha$ -Fe<sub>2</sub>O<sub>3</sub> Semiconductor Nanoparticles, *J. Phys. Chem. B*, 1998, **102**, 770-776.
